# Supplementary material for: Al-Embedded C2N: a DFT study on a promising catalyst for CO oxidation
Source: Royal Society of Chemistry journal article supplement (doi:10.1039/d1nj05689a), 2022-01-01
Supplement: d1nj05689a1.pdf [file d1nj05689a1.pdf]

## Supporting Information

Al-embedded C<sub>2</sub>N: DFT Study on a Promising Catalyst for CO Oxidation

Xinmiao Liu, and Li Sheng\*

MIIT Key Laboratory of Critical Materials Technology for New Energy Conversion and Storage, School of Chemistry and Chemical Engineering, Harbin Institute of Technology, Harbin 150001, PR China

**Table S1.** The computed energies (E, a.u.) of various species by considering different spin-state in the present work.

|                                     | S=1/2        | S=3/2        | S=0          | S=1          |
|-------------------------------------|--------------|--------------|--------------|--------------|
| Al                                  | -242.368235  | -242.229243  | -            | -            |
| Al-C <sub>2</sub> N                 | -2278.319881 | -2278.312415 | -            | -            |
| O <sub>2</sub>                      | -            | -            | -150.253684  | -150.316263  |
| O <sub>2</sub> /C <sub>2</sub> N    | -            | -            | -2186.088193 | -2186.147104 |
| O <sub>2</sub> /Al-C <sub>2</sub> N | -2428.73254  | -2428.712275 | -            | -            |

|                    |              |              |  |  |
|--------------------|--------------|--------------|--|--|
| $O_2 + CO/Al-C_2N$ | -2542.209548 | -2542.022506 |  |  |
|--------------------|--------------|--------------|--|--|

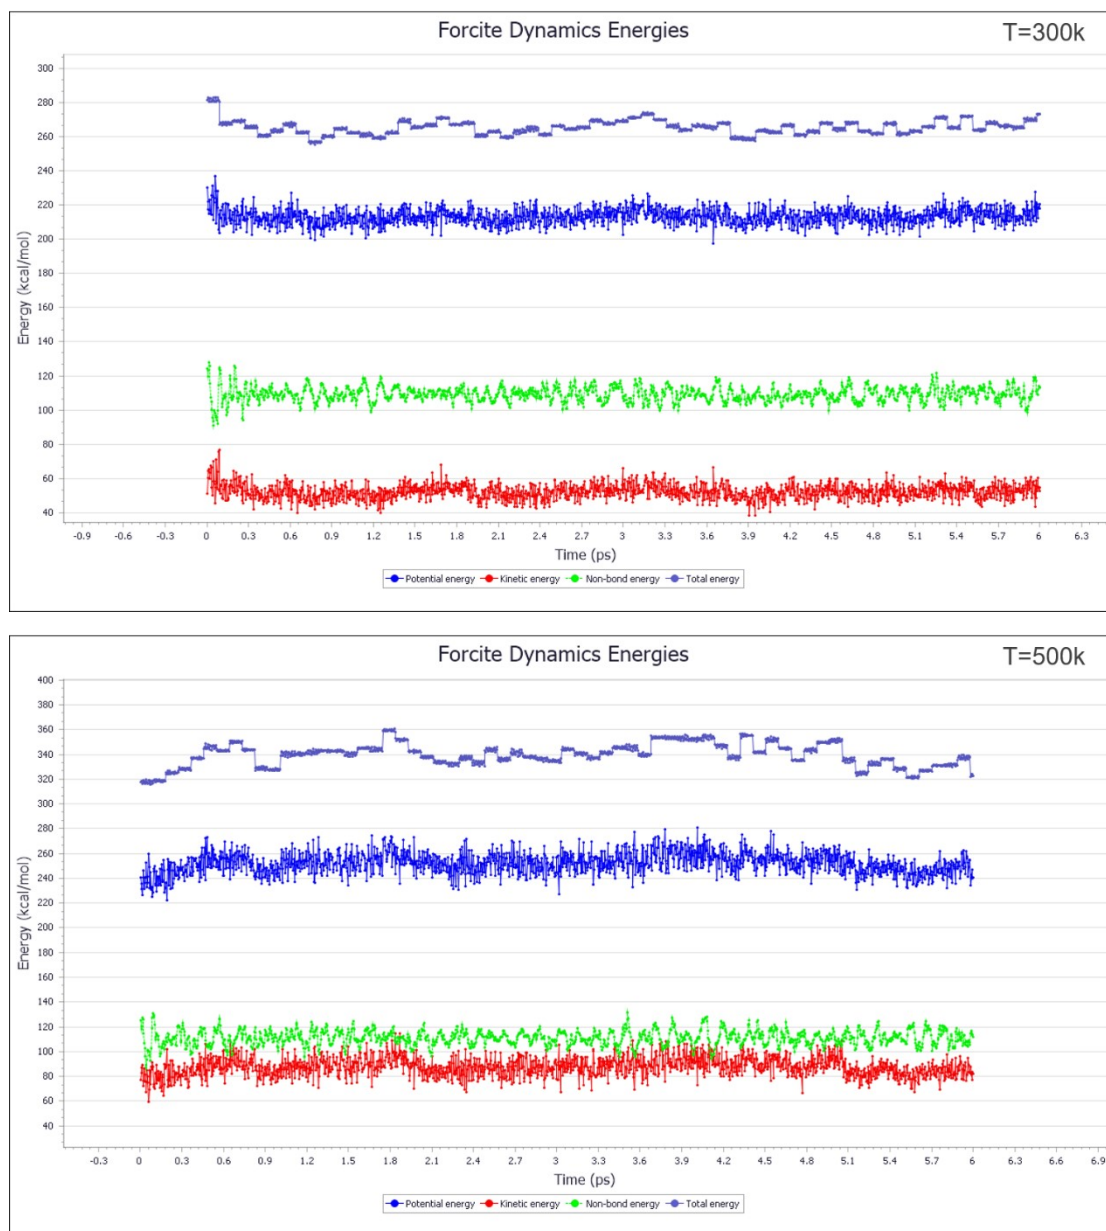

**Fig. S1.** Molecular dynamics simulations of Al-C<sub>2</sub>N at 300 and 500 K, respectively.

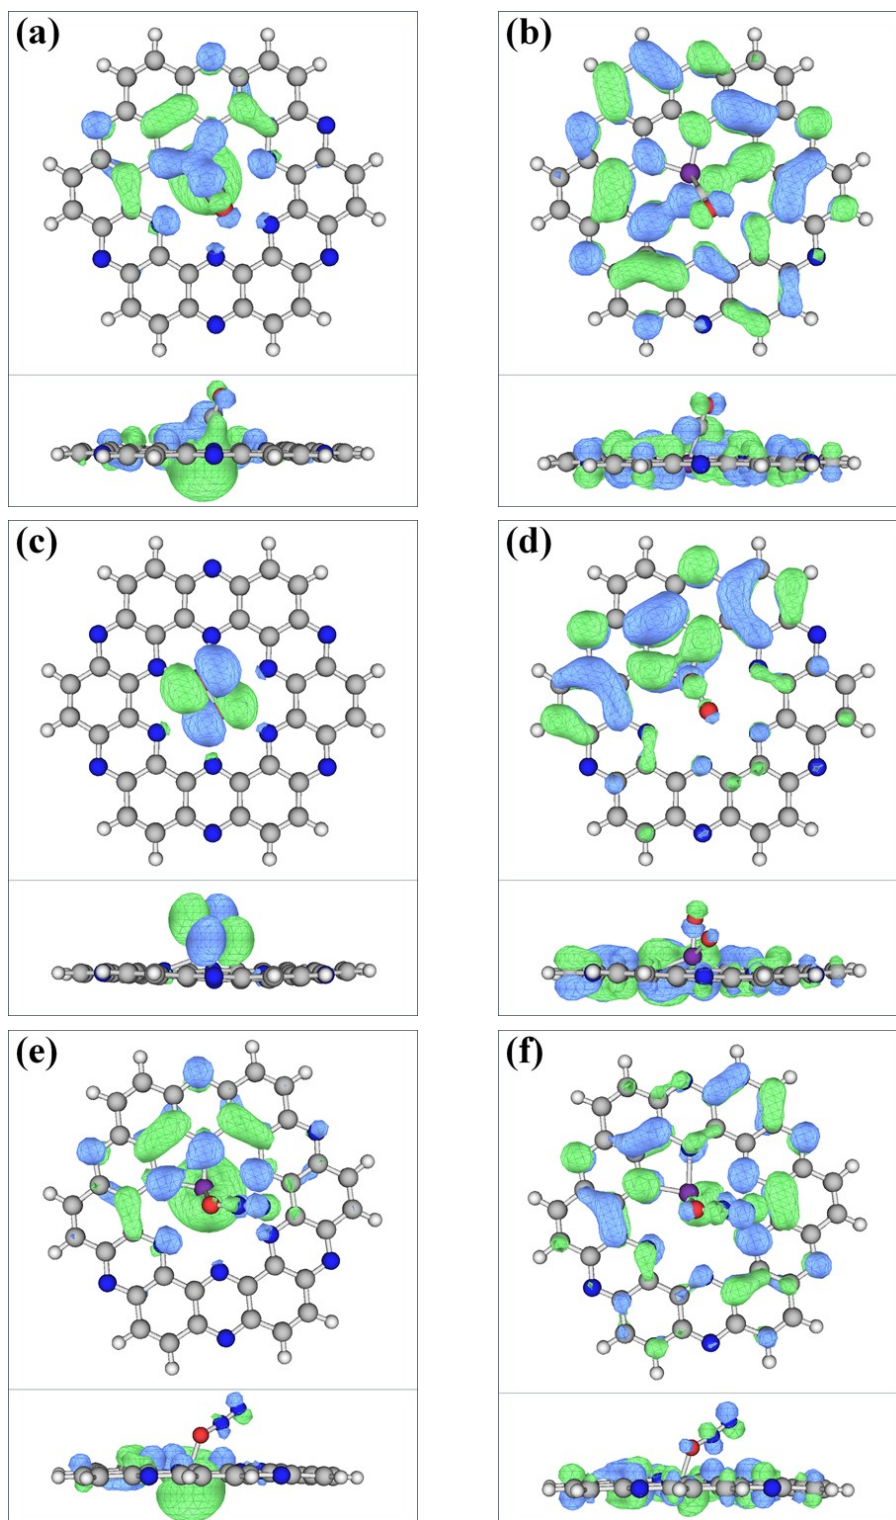

**Fig. S2.** HOMO (a, c, e) and LUMO (b, d, f) orbitals of the Al-C<sub>2</sub>N surface after gas adsorption.

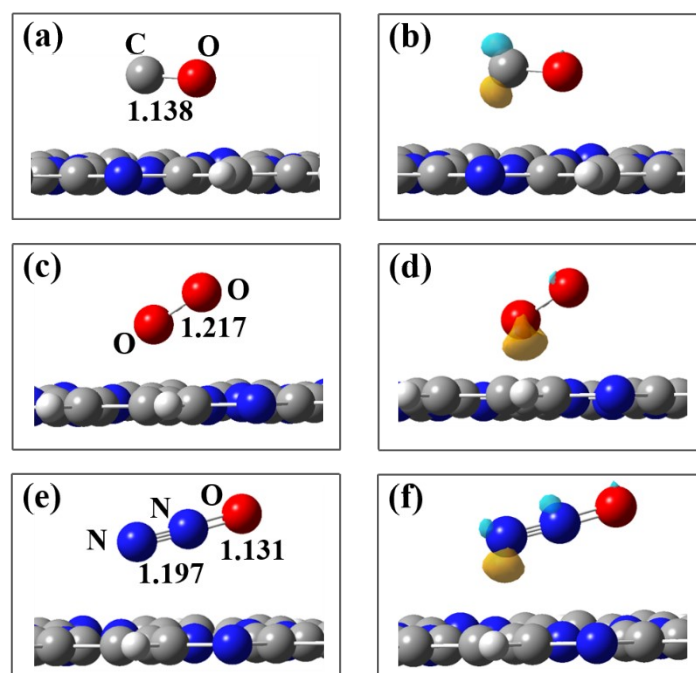

**Fig. S3.** The local configurations and relevant structural parameters for CO, O<sub>2</sub>, and N<sub>2</sub>O adsorption on the C<sub>2</sub>N monolayer are shown in (a), (c), and (e), respectively. The EDD plots (in 0.003 au) for CO, O<sub>2</sub>, and N<sub>2</sub>O on the C<sub>2</sub>N monolayer are shown in (b), (d), and (f), respectively. Blue and yellow regions represent the charge accumulation and depletion, respectively. All bond distances are given in Å.
